# Supplementary material for: Correlations of Behavioral Deficits with Brain Pathology Assessed through Longitudinal MRI and Histopathology in the R6/2 Mouse Model of HD
Source: PLoS One. 2013 Apr 4;8(4):e60012. doi: 10.1371/journal.pone.0060012 (PMC3617160; doi:10.1371/journal.pone.0060012)
Supplement: Table S7 — Correlation of behavioral decline versus MRI measures of brain abnormalities over time. Correlation of behavioral abnormalities and regional brain abnormalities determined through MRI, presented as Pearson r values. RR = rotarod, EXP = exploratory activity in an open field, THG = thigmotaxis in an open field, STR = striatum, CTX = cortex, HIPP = hippocampus, CC = corpus callosum, WB = whole brain, MUSC = muscle. *p<.05, **p<.01. (XLSX) [file pone.0060012.s009.xlsx]

## Sheet: Sheet1
		Volumetry					T2 relaxivity
		STR	CTX	HIPP	CC	WB	STR	CTX	HIPP	CC	MUSC
WT males	RR	0.106	0.071	0.435*	0.038	0.286	-0.526**	-0.528**	-0.391*	-0.54**	-0.086
	EXP	-0.091	-0.034	-0.489**	-0.175	-0.304	0.264	0.212	0.174	0.384	0.325
	THG	-0.136	0.23	0.367	0.028	0.394*	-0.357	-0.245	-0.238	-0.388	-0.295
WT females	RR	0.296	0.409*	-0.302	-0.088	0.061	-0.077	-0.118	-0.33	-0.258	-0.204
	EXP	-0.182	-0.129	-0.103	0.015	-0.168	0.024	0.012	-0.056	0.07	0.026
	THG	0.257	-0.085	0.109	0.145	0.287	-0.47*	-0.391*	-0.124	-0.256	-0.055
R6/2 males	RR	-0.112	0.415*	0.416*	-0.011	0.416*	0.619**	0.549**	0.545**	0.565**	0.475**
	EXP	-0.38*	0.572**	0.487**	0.552**	0.533**	0.689**	0.715**	0.585**	0.633**	0.391*
	THG	0.31	0.096	0.371*	-0.107	0.403*	-0.107	-0.086	-0.104	-0.069	-0.019
R6/2 females	RR	0.001	0.416*	0.332	-0.075	0.283	0.265	0.481*	0.463*	0.537**	0.34
	EXP	0.001	0.372	0.558**	0.528**	0.3	0.496**	0.714**	0.759**	0.704**	0.406*
	THG	0.306	0.183	0.076	-0.024	-0.234	-0.33	-0.006	0.013	-0.018	-0.055
WT & R6/2 males	RR	0.096	0.433**	0.542**	0.219	0.493**	0.229	0.171	0.215	0.184	0.288*
	EXP	-0.085	0.551**	0.296*	0.377**	0.418**	0.567**	0.541**	0.462**	0.554**	0.41**
	THG	0.088	0.148	0.312*	0.011	0.315*	-0.165	-0.122	-0.13	-0.154	-0.1
WT & R6/2 females	RR	0.325*	0.585**	0.202	-0.016	0.384**	0.027	0.116	0.018	0.047	0.057
	EXP	0.016	0.291*	0.345**	0.302*	0.21	0.297*	0.429**	0.412**	0.388**	0.222
	THG	0.356**	0.246	0.19	0.066	0.107	-0.376**	-0.128	-0.047	-0.111	-0.016
